# Supplementary material for: Identification of downy mildew resistance gene candidates by positional cloning in maize (Zea mays subsp. mays; Poaceae)
Source: PubMed Central journal article supplement — Appl Plant Sci. 2017 Feb 14;5(2):apps.1600132. doi: 10.3732/apps.1600132 (PMC5315382; doi:10.3732/apps.1600132), 2017-02-14

GRMZM2G137326

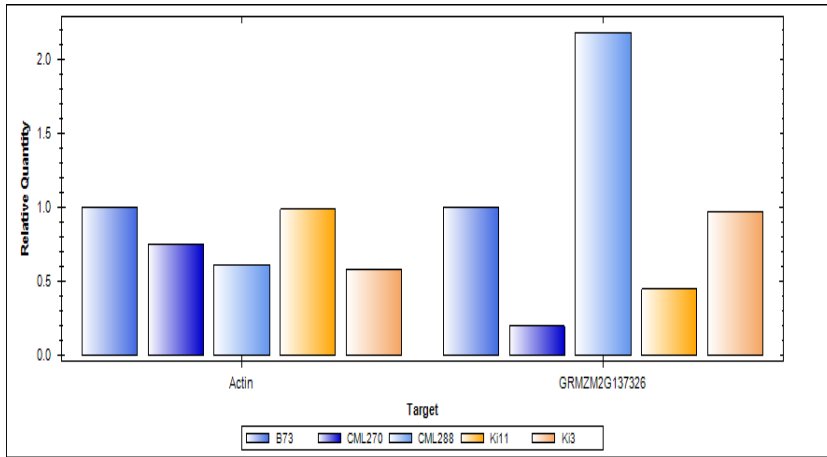

GRMZM2G137151 T1

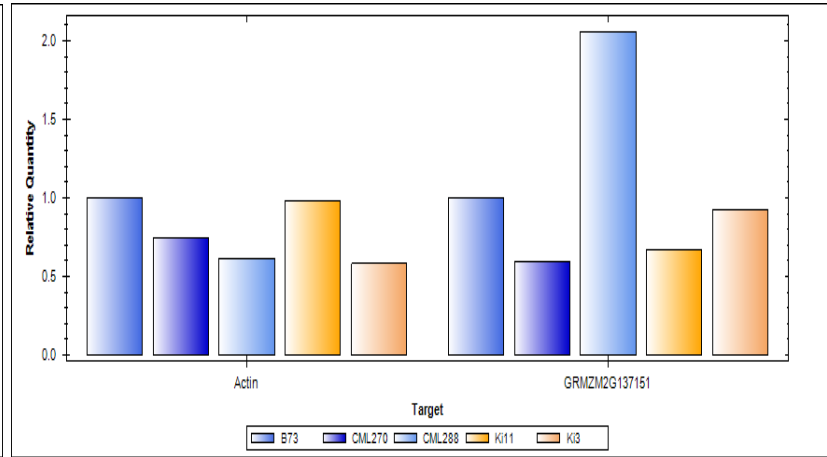

GRMZM2G137151 T2

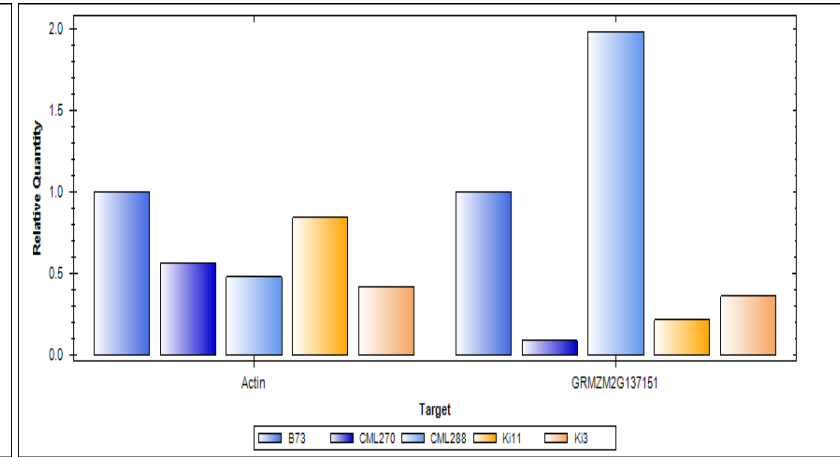

GRMZM2G025074

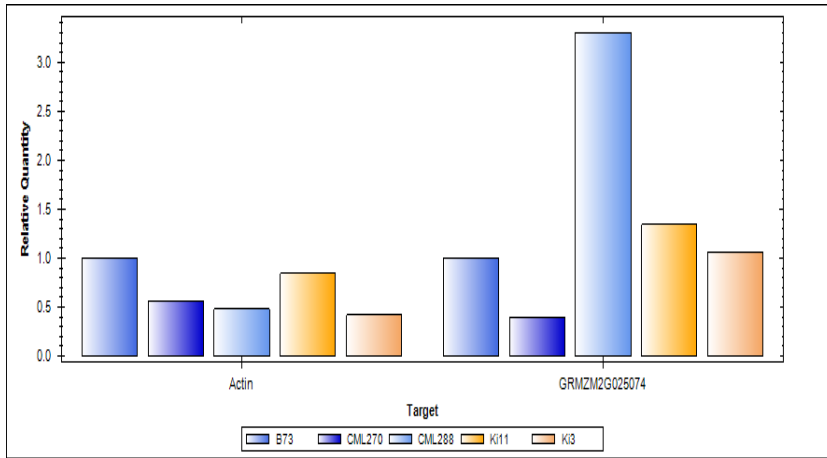

GRMZM2G025074 T1

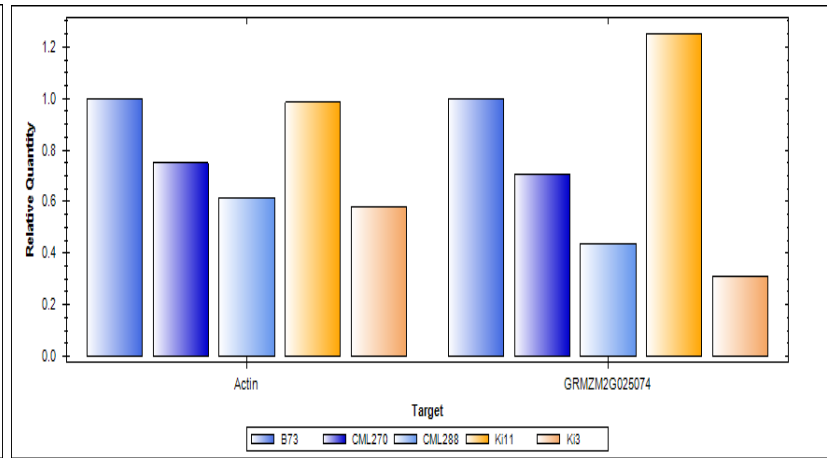

GRMZM2G025074 T2

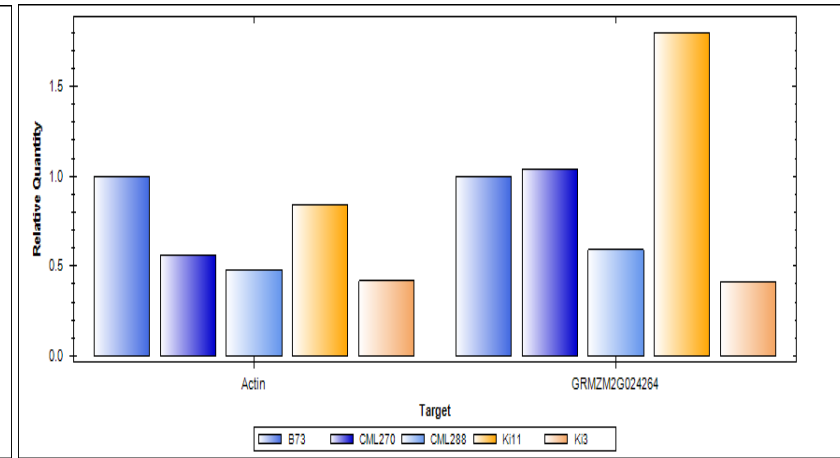

GRMZM2G141202

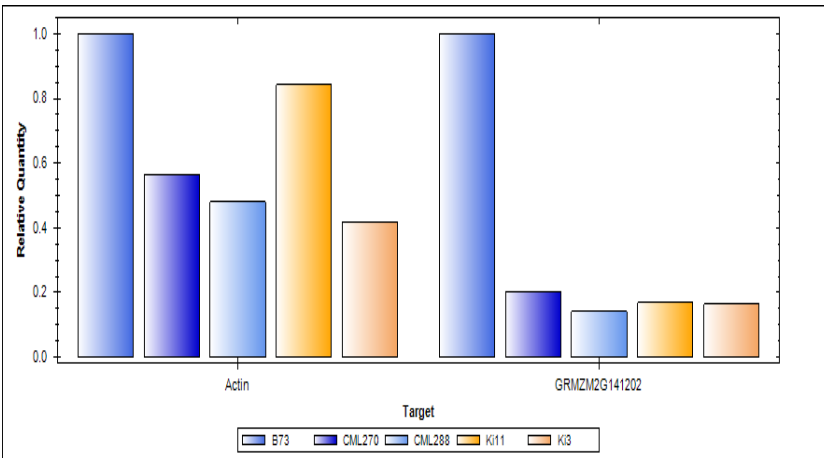

GRMZM2G141205

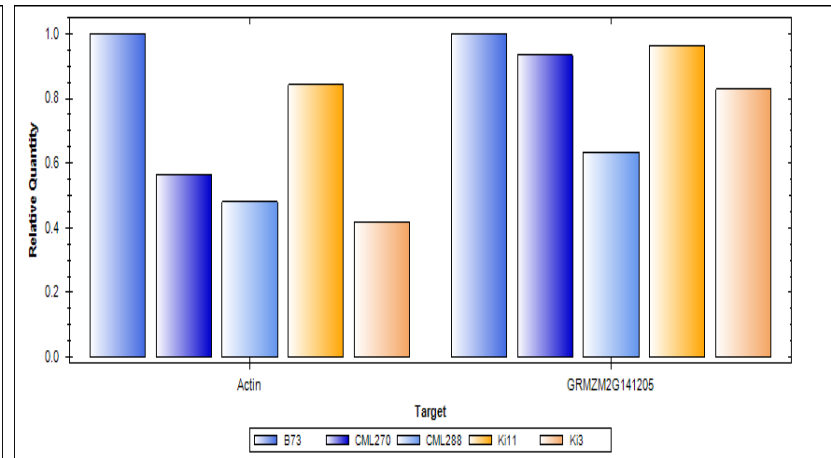

GRMZM2G363116

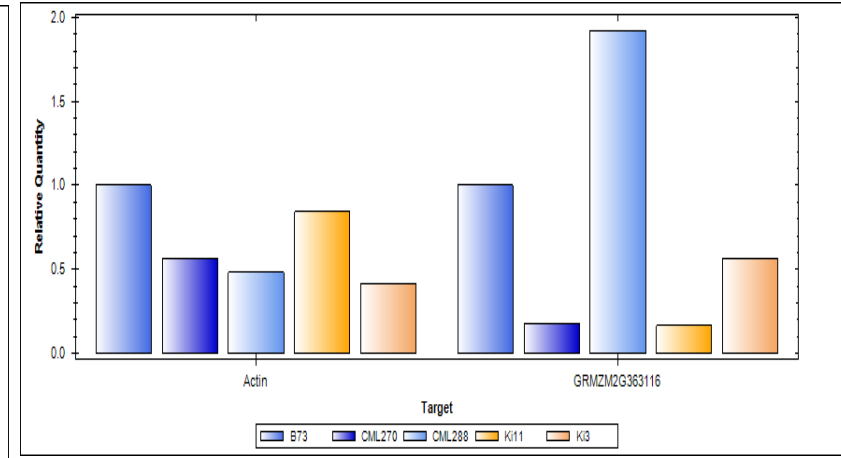

GRMZM2G122712

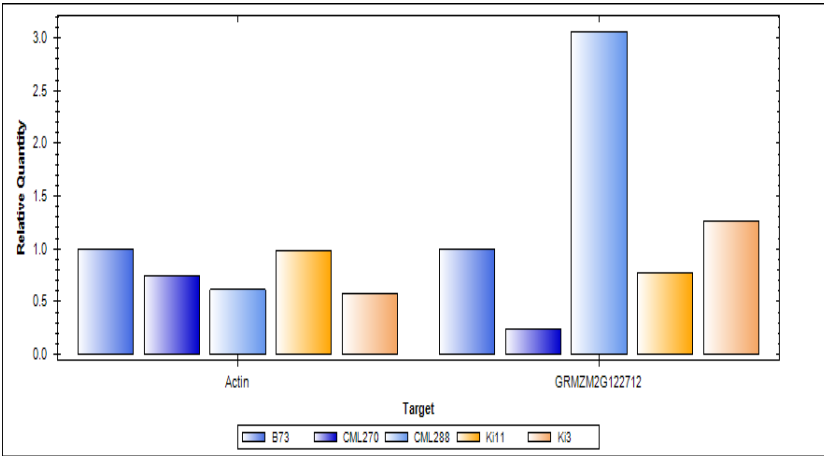

GRMZM5G827496

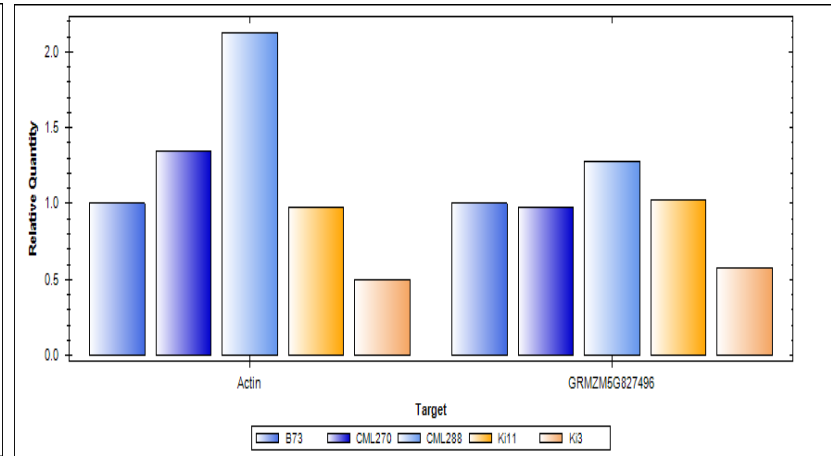

GRMZM2G322220

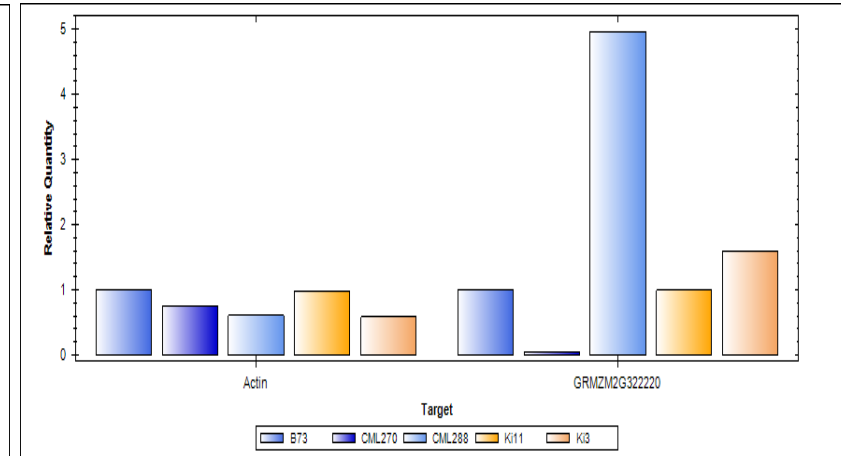

GRMZM2G047607 T1

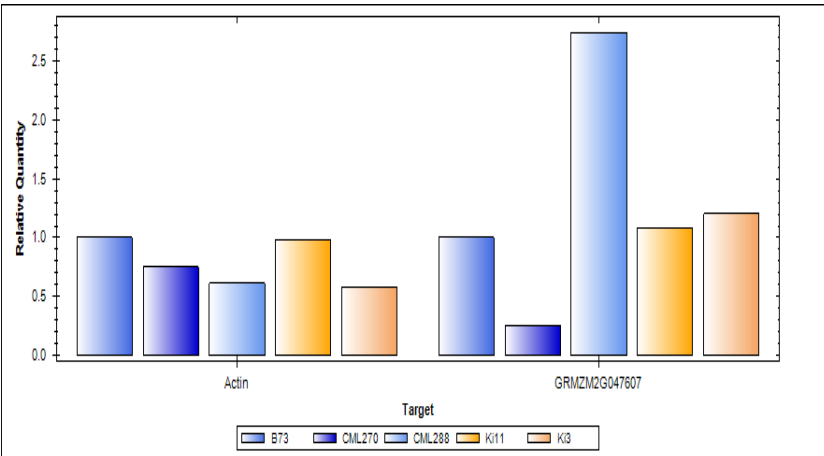

GRMZM2G047607 T2

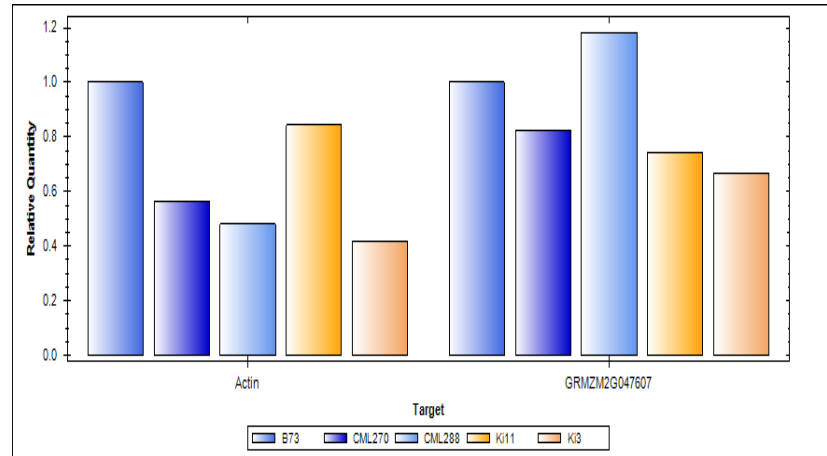

AC209636.2

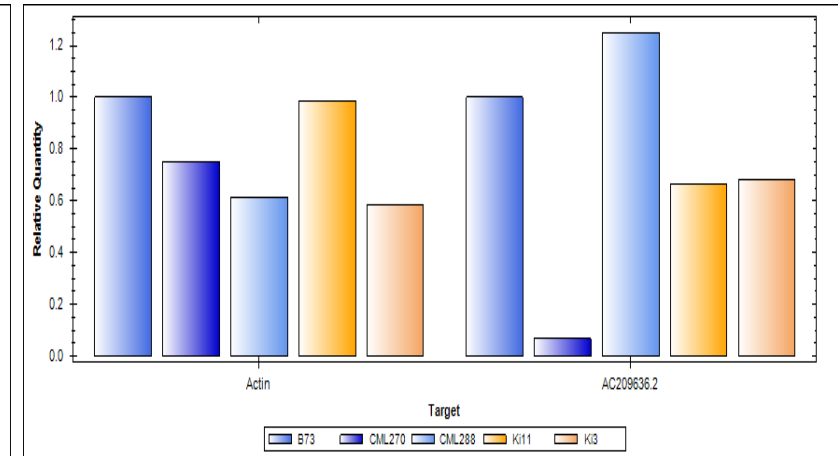

GRMZM2G141208 T1

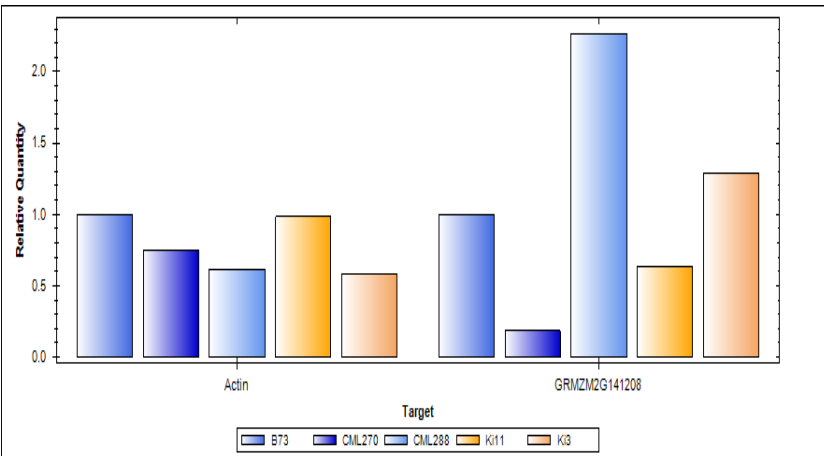

GRMZM2G141208 T2

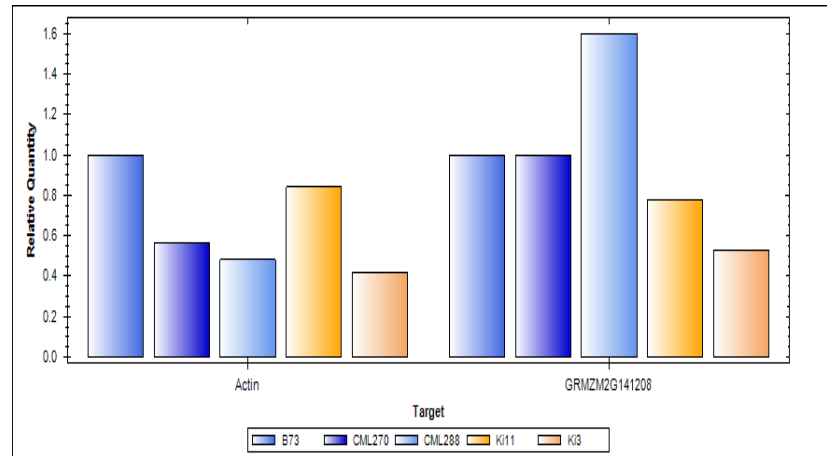

GRMZM2G042154

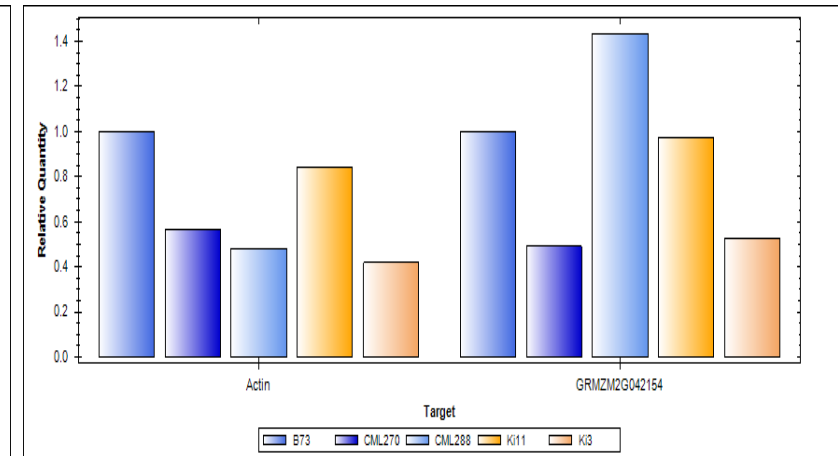

GRMZM2G167243

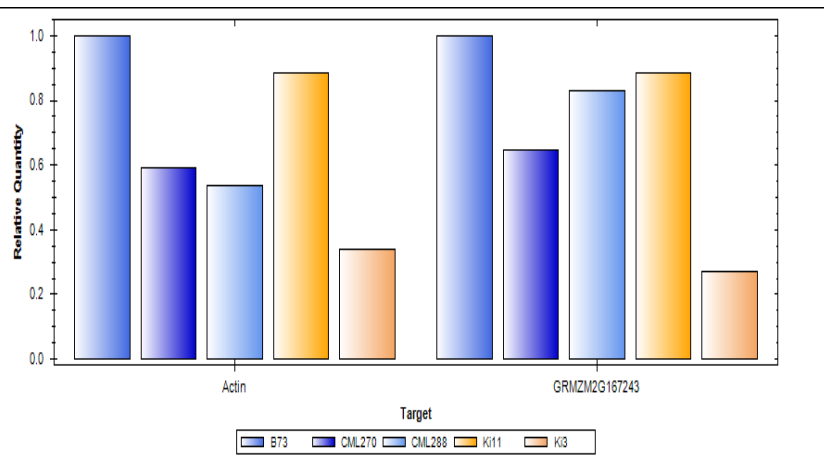

GRMZM5G891783 T1

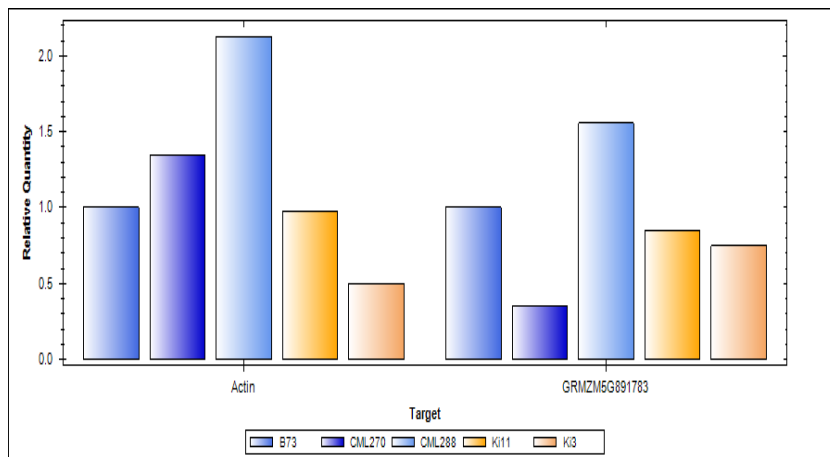

GRMZM5G891783 T2

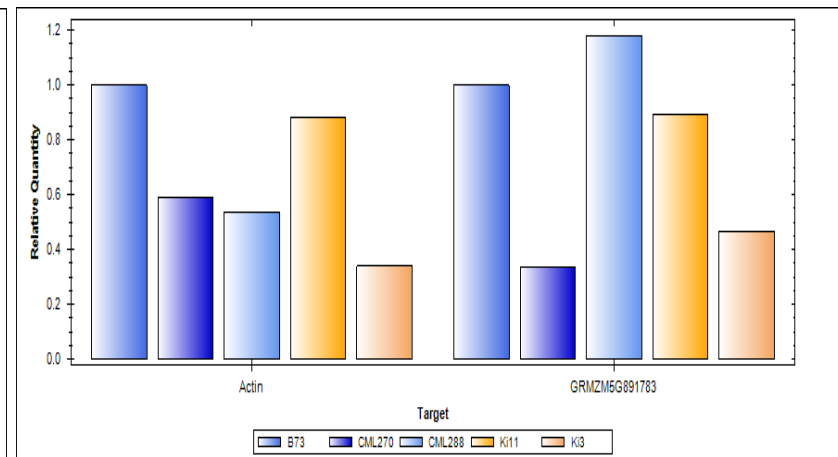

GRMZM2G010302

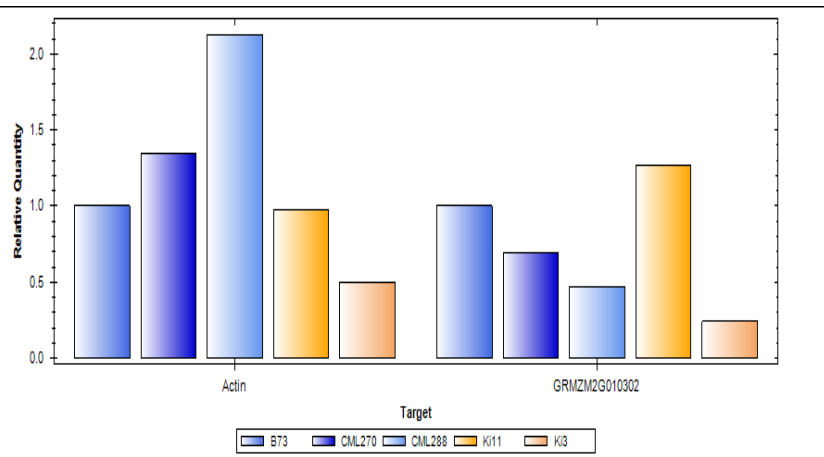

GRMZM2G398055

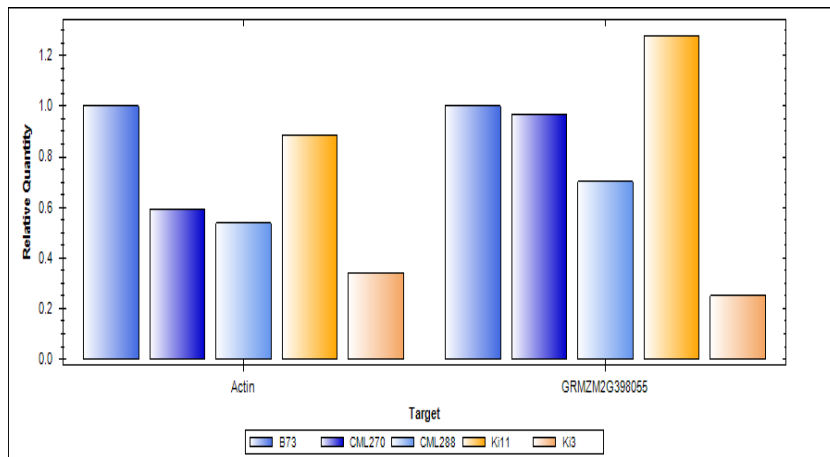

GRMZM2G098209

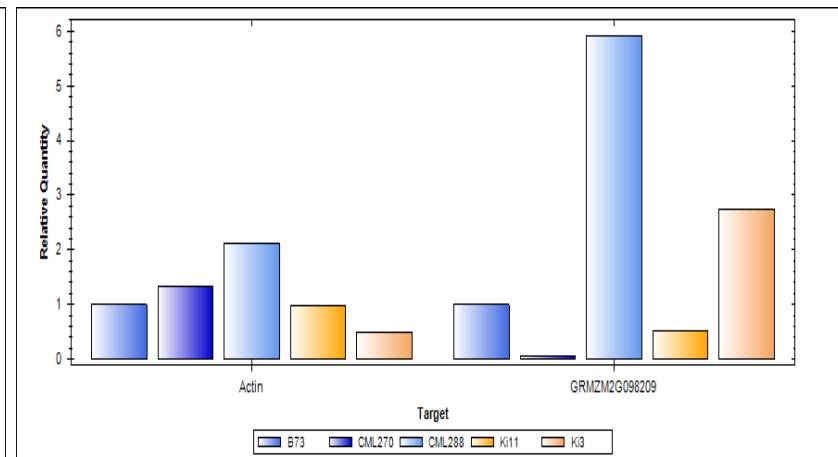

GRMZM2G133082 T2

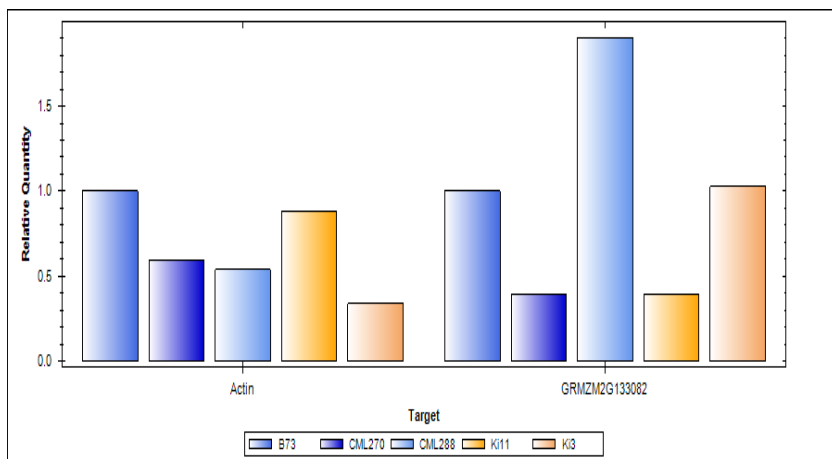

GRMZM2G554314

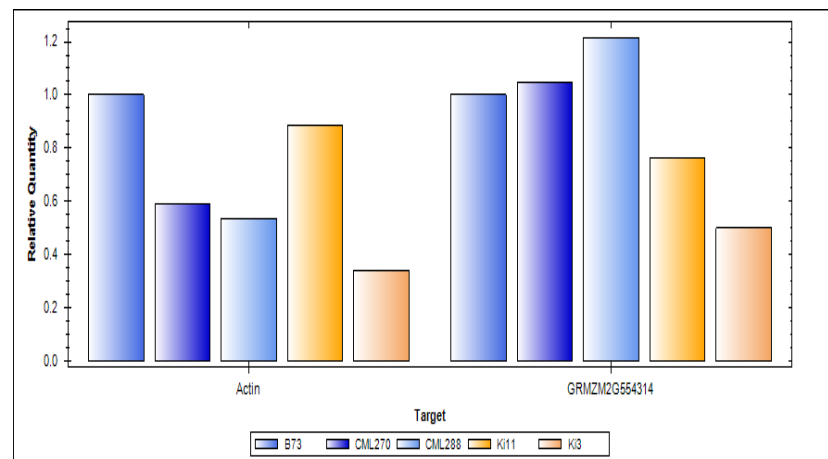

GRMZM2G121514 T1

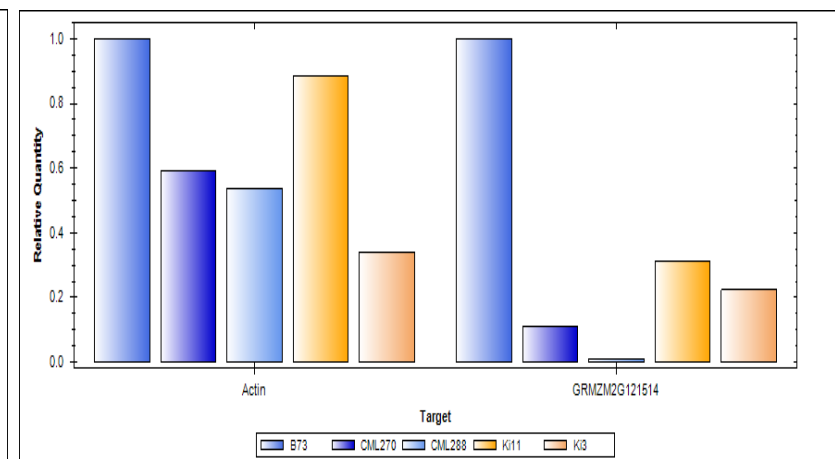

GRMZM2G108773

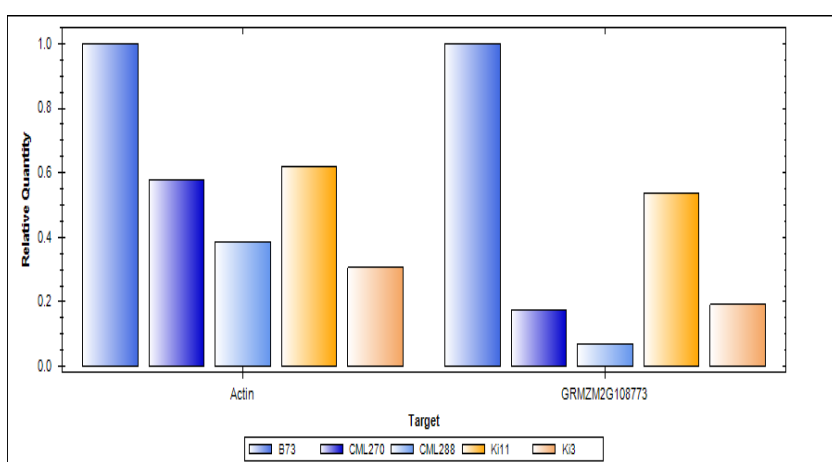

GRMZM2G133021

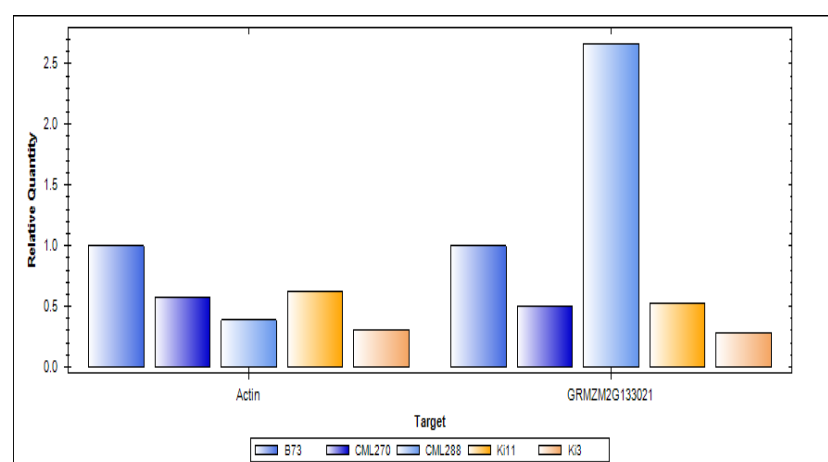

GRMZM2G121565 T1

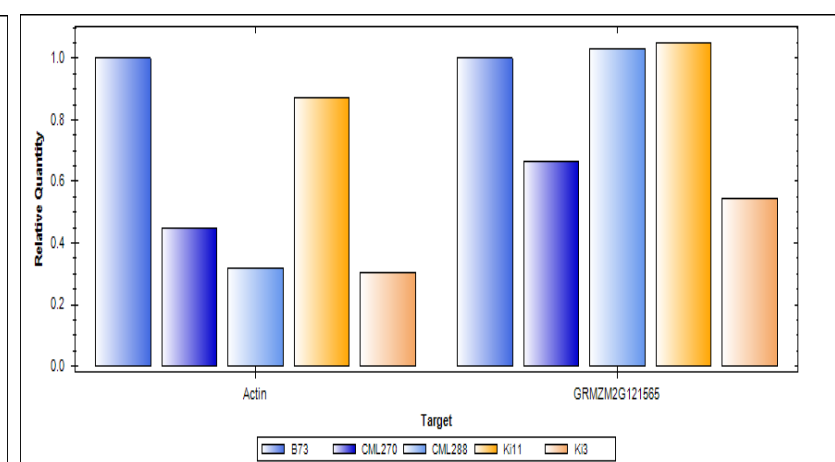

GRMZM2G045236 T1

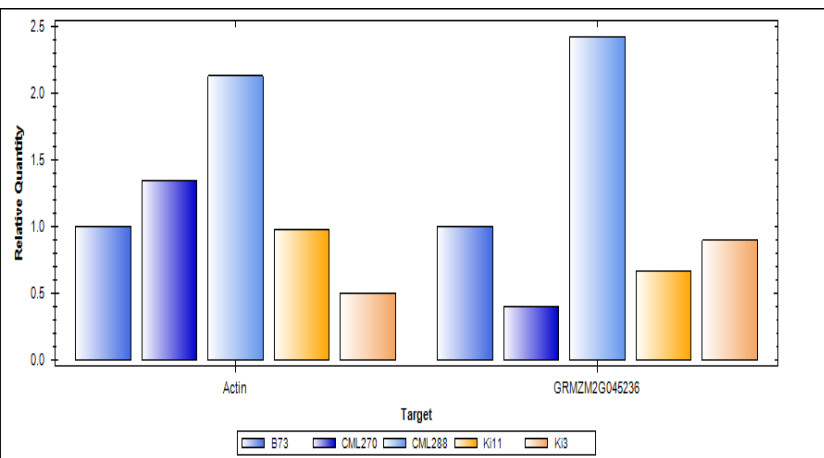

GRMZM2G045236 T2

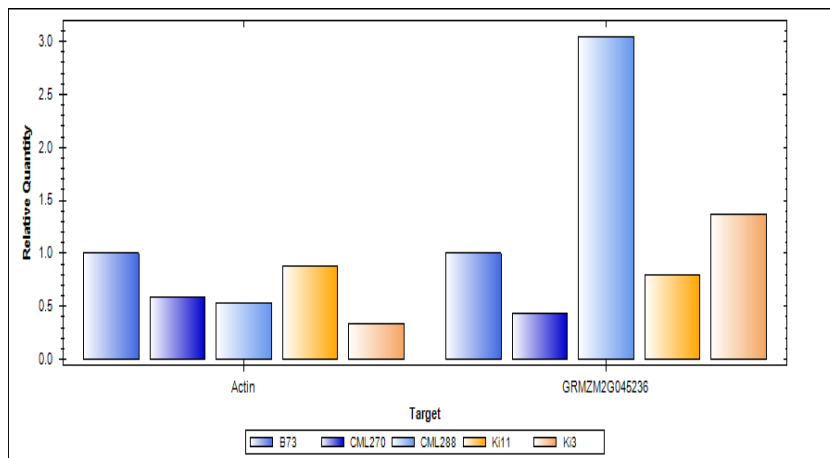

GRMZM2G117608

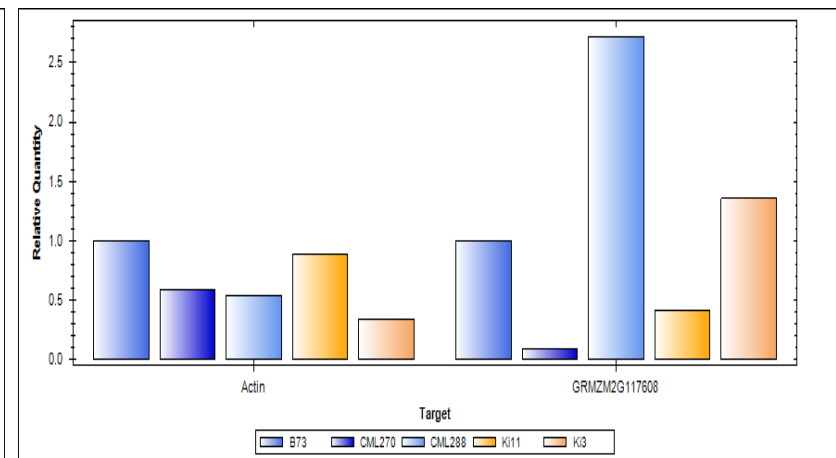

GRMZM2G097989

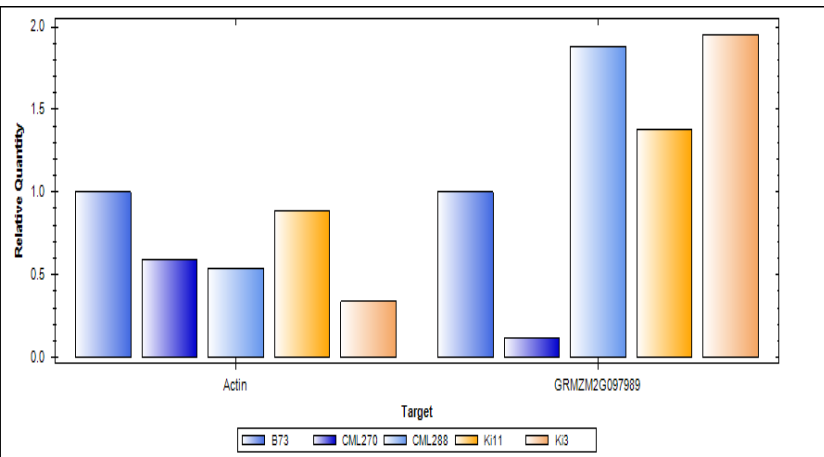

GRMZM2G133082 T1

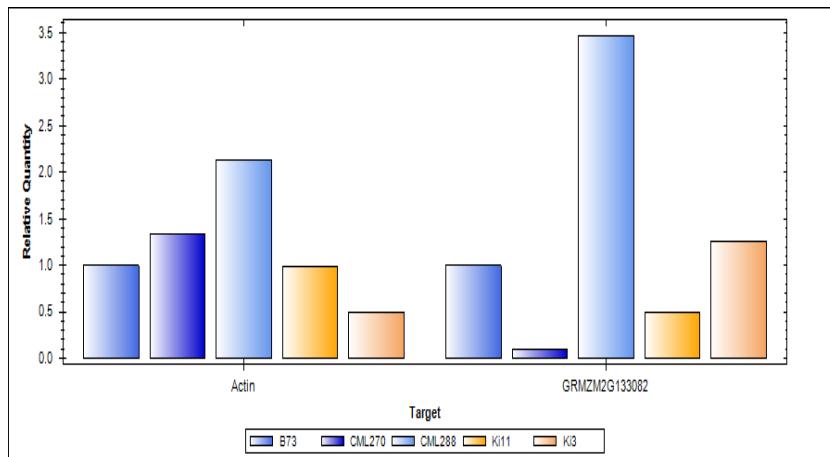

GRMZM2G121514 T2

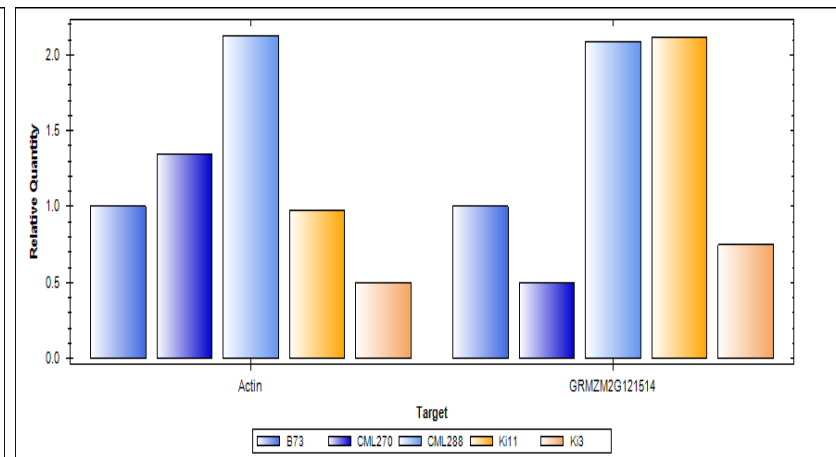

GRMZM2G121487

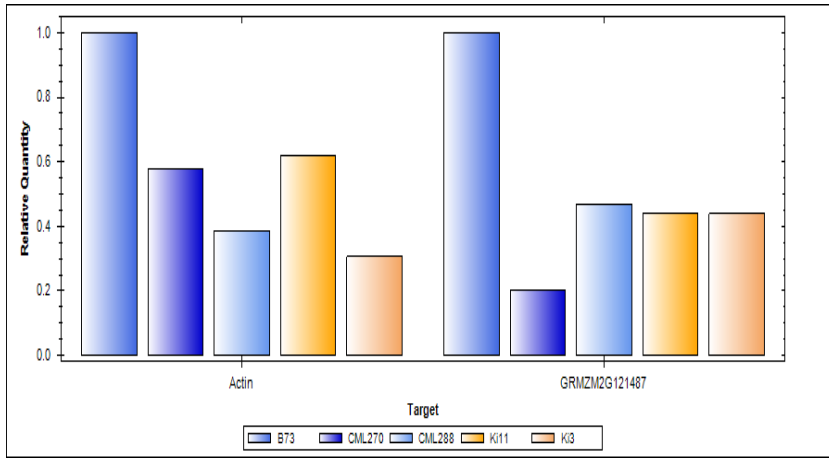

GRMZM2G117615 T1

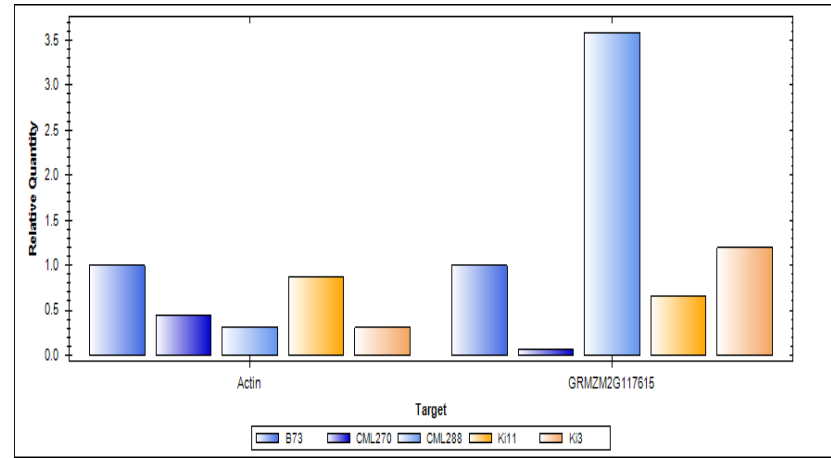

GRMZM2G117615 T2

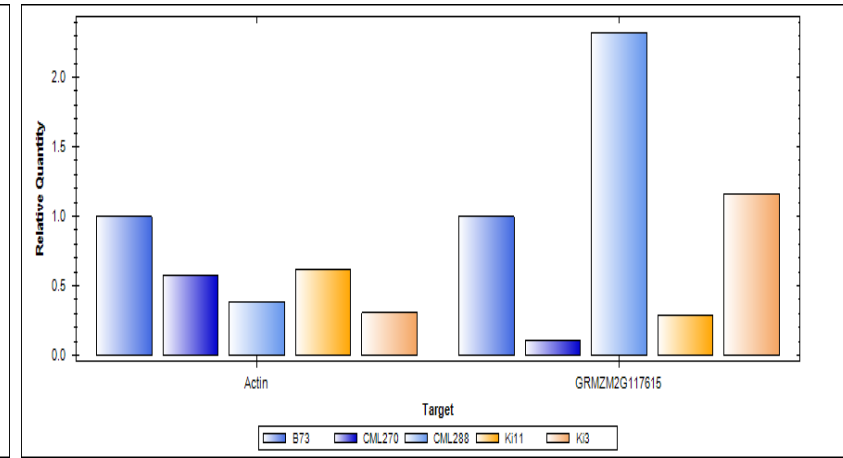

GRMZM2G016817 T1

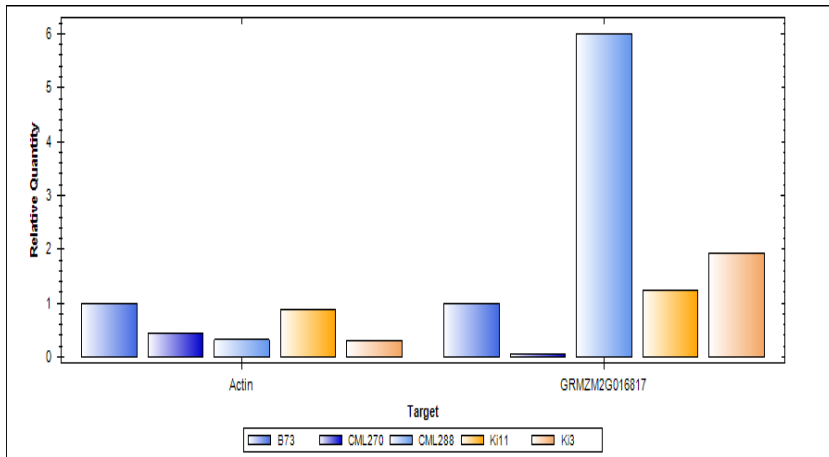

GRMZM2G017817 T2

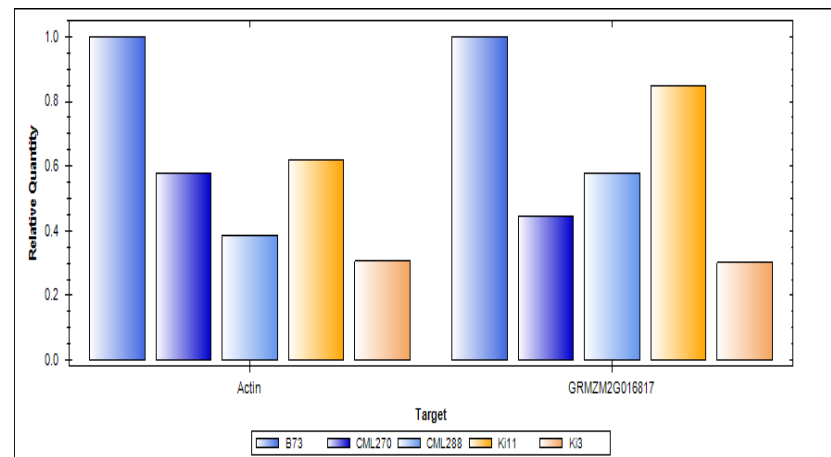

GRMZM2G062577

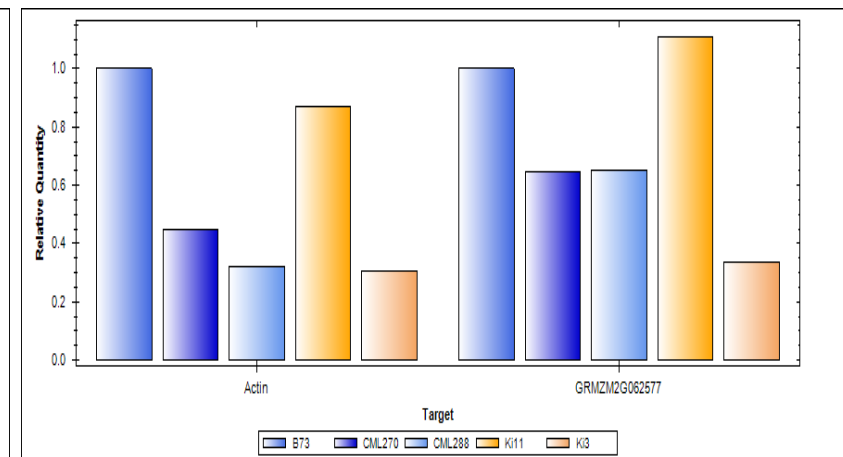

GRMZM2G425230

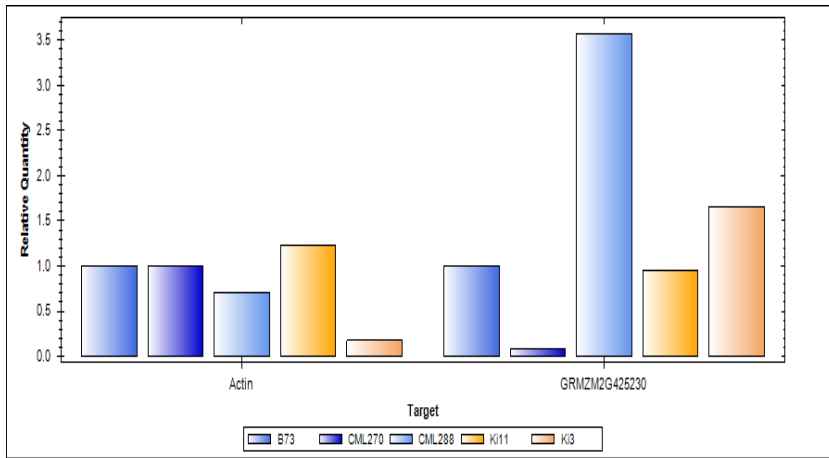

GRMZM2G147961

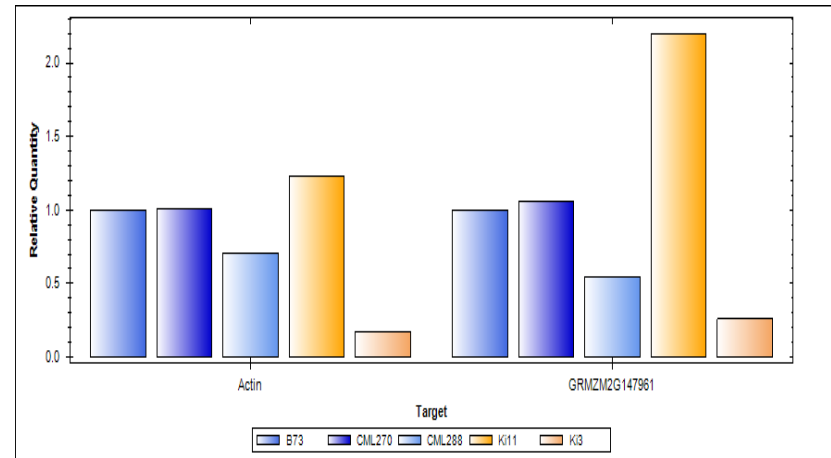

GRMZM5G881803

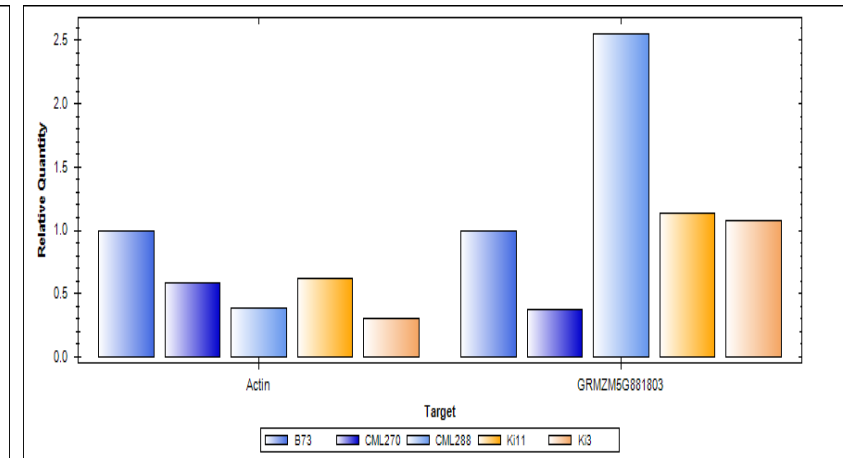

GRMZM2G147867

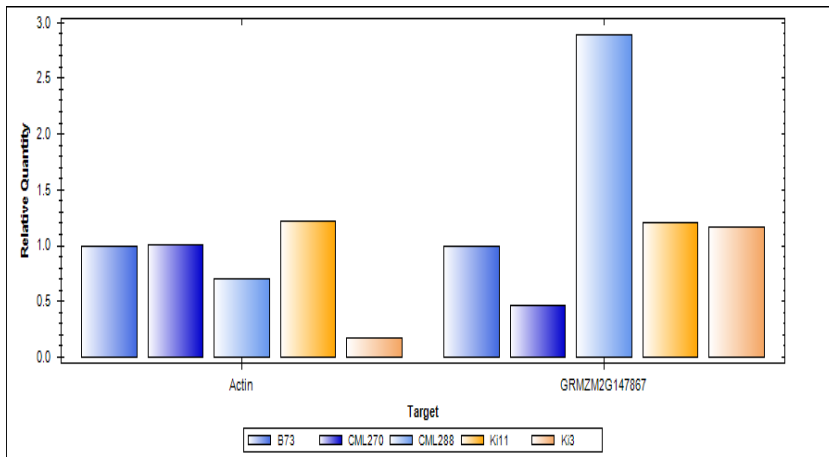

GRMZM5G892467

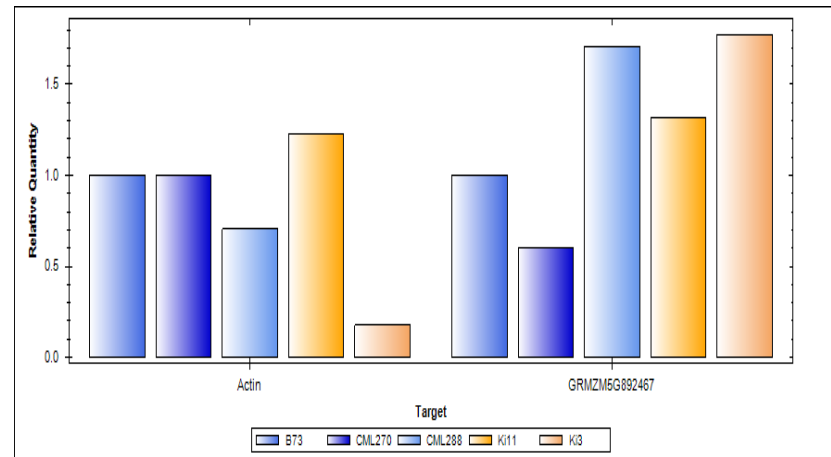

GRMZM5G833124

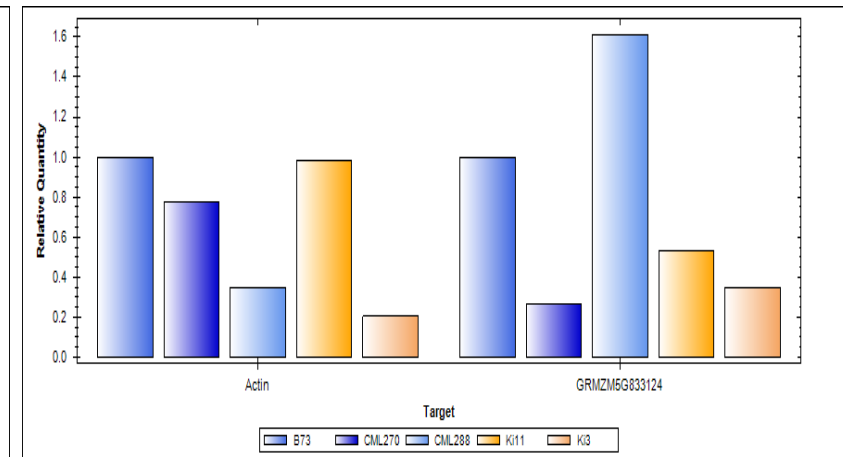



GRMZM2G117507

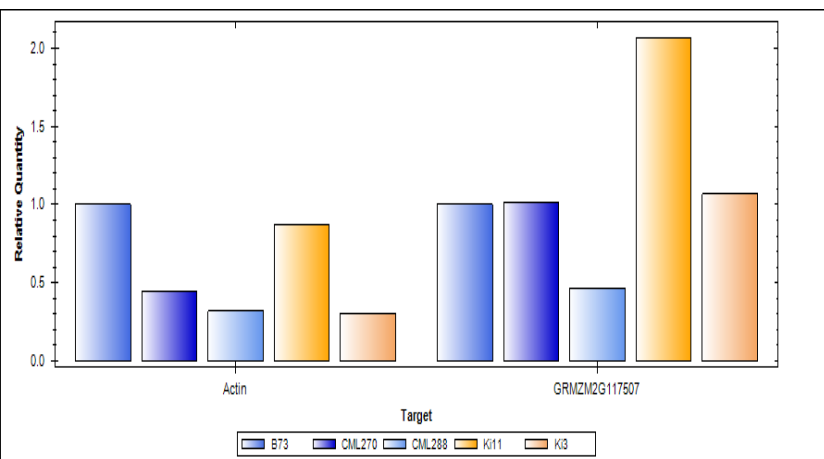

GRMZM2G066029

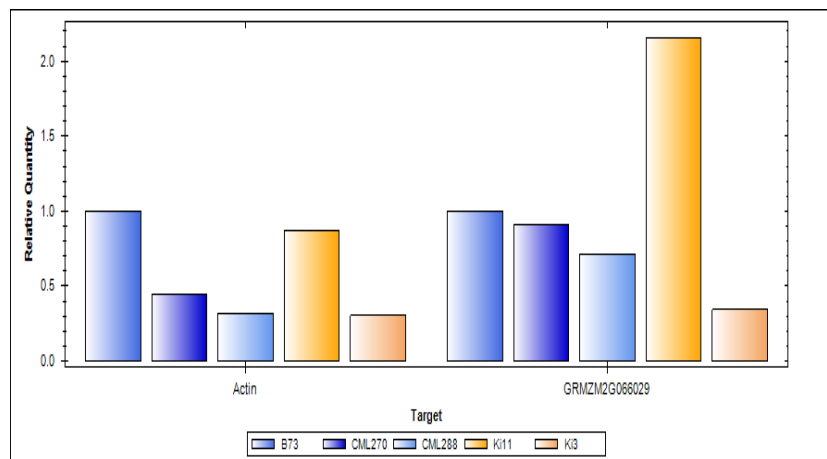

GRMZM2G447535

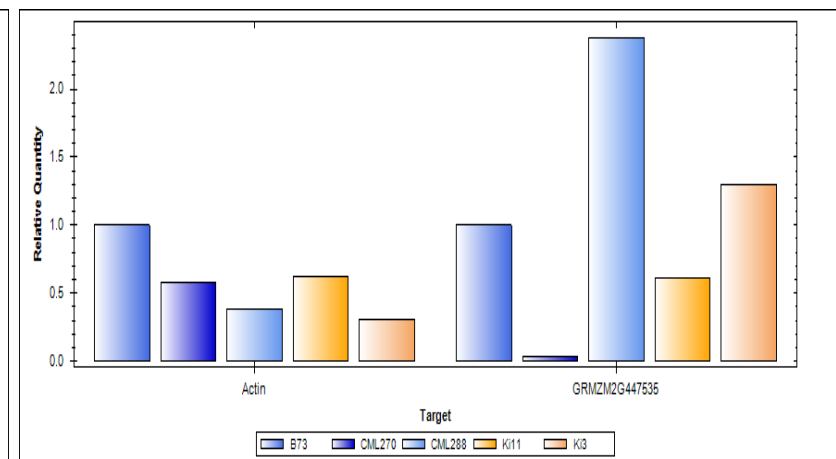

GRMZM2G070075

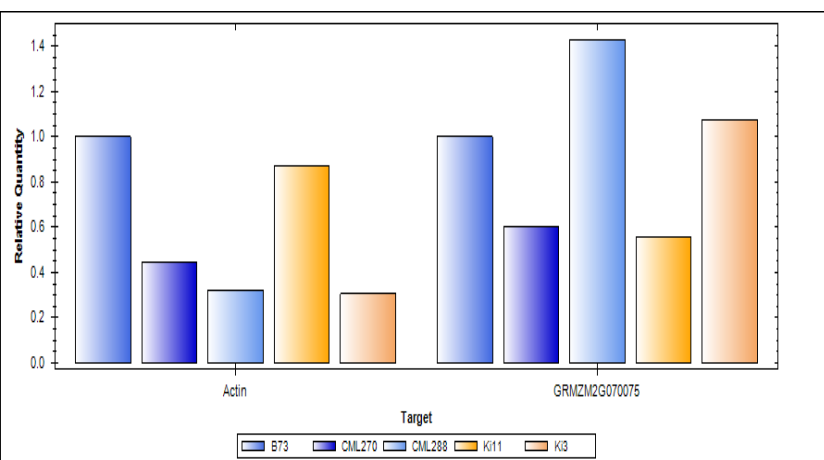

GRMZM2G126302

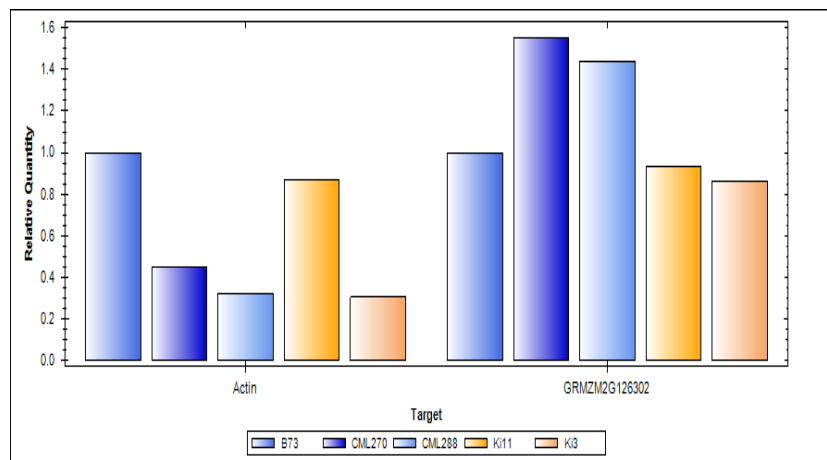

GRMZM5G844912

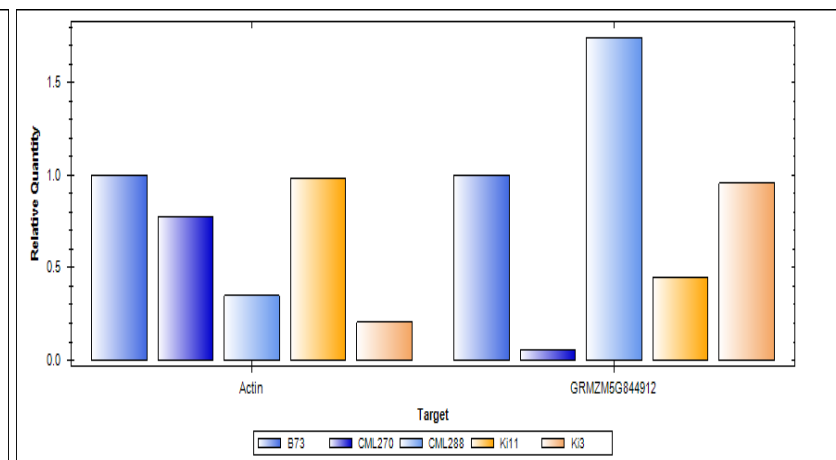

GRMZM2G026523 T1

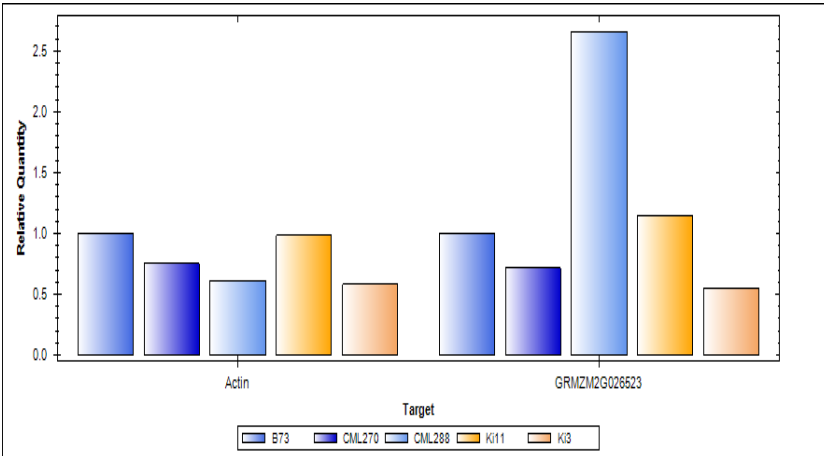

GRMZM2G026523 T2

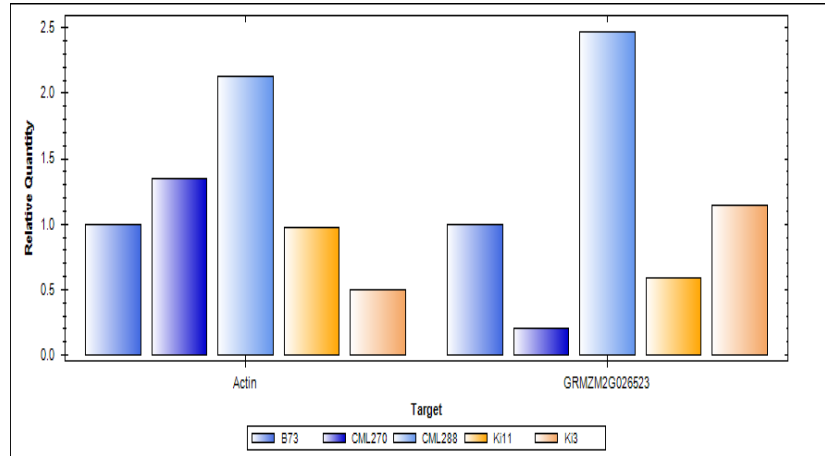

GRMZM2G062452

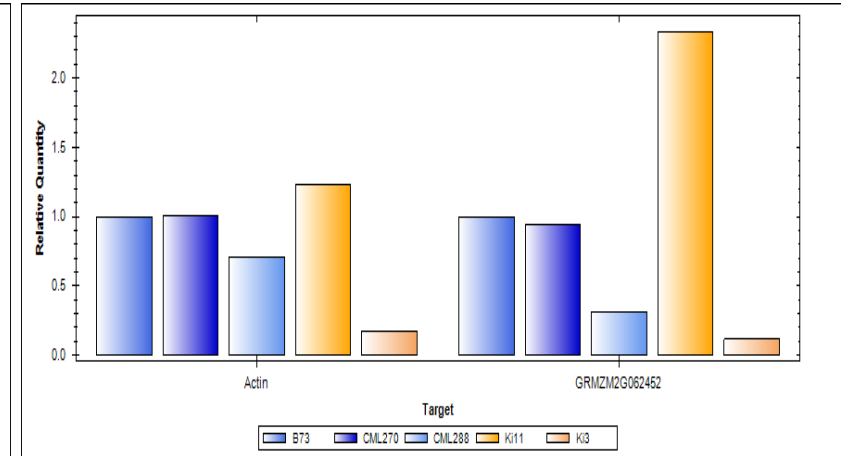

GRMZM2G121565 T2

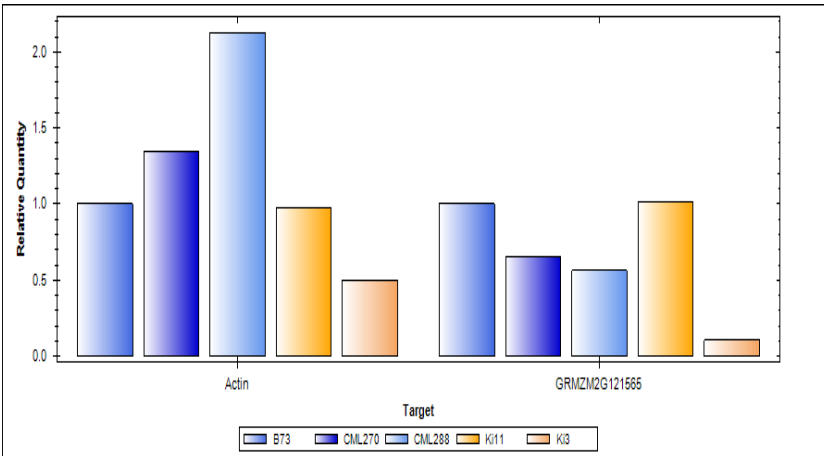

GRMZM5G854391

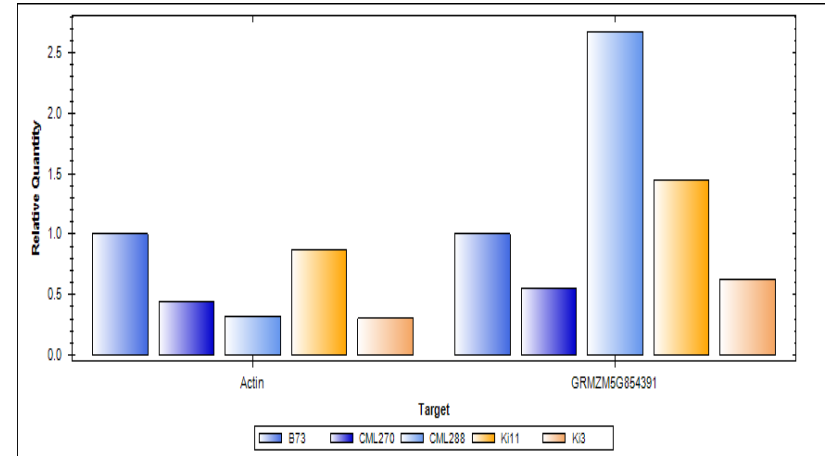

Supplement: apps.1600132_s7.pdf [file apps.1600132_s7.pdf]
