# Supplementary material for: Identification of downy mildew resistance gene candidates by positional cloning in maize (Zea mays subsp. mays; Poaceae)
Source: PubMed Central journal article supplement — Appl Plant Sci. 2017 Feb 14;5(2):apps.1600132. doi: 10.3732/apps.1600132 (PMC5315382; doi:10.3732/apps.1600132), 2017-02-14
Supplement: apps.1600132_s9.pdf [file apps.1600132_s9.pdf]

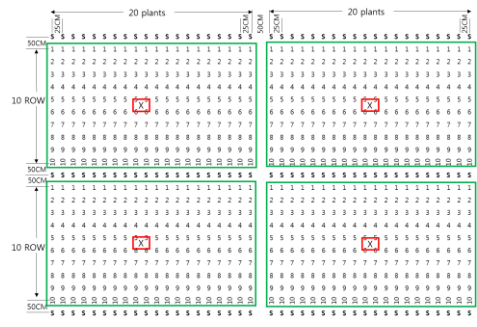

**DM-resistant plant selection using spreader row technique in the field.**

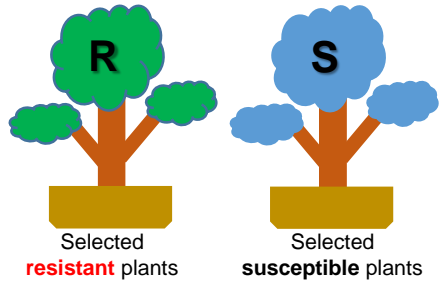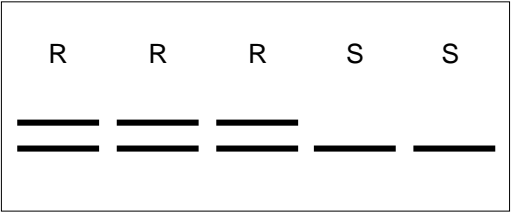

**QTL screening with selected plants**

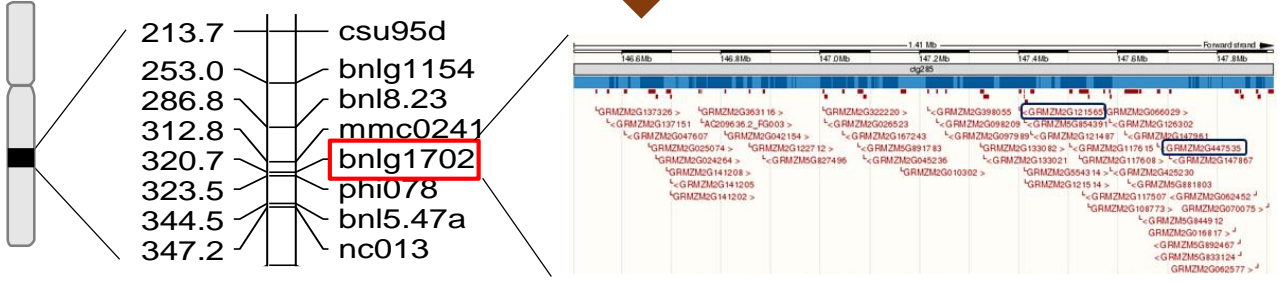

**Positional cloning to find DM-resistance region without fine mapping, using bioinformatics analysis to obtain genetic, sequence information. (Predicted transcripts were obtained from selected DM-resistance region)**

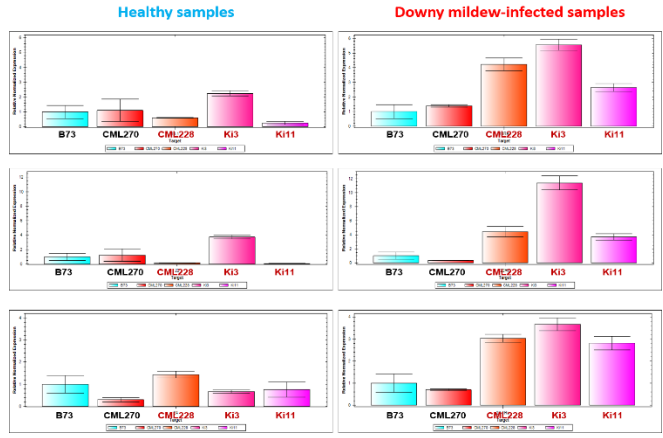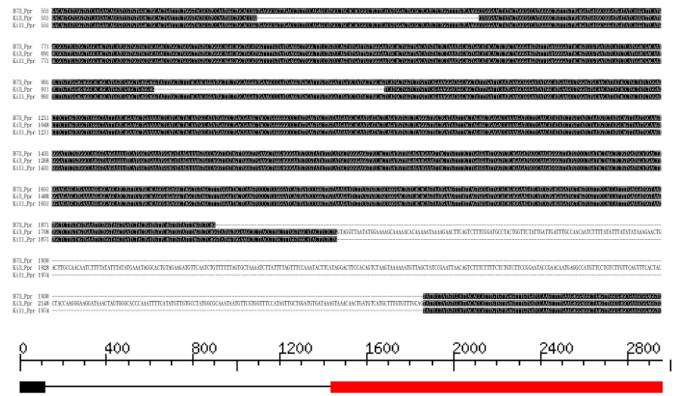

**Expression verification and identification of DM-resistant gene candidates by qRT-PCR**
